# Supplementary material for: Predicting COVID-19—Comorbidity Pathway Crosstalk-Based Targets and Drugs: Towards Personalized COVID-19 Management
Source: Biomedicines. 2021 May 17;9(5):556. doi: 10.3390/biomedicines9050556 (PMC8156524; doi:10.3390/biomedicines9050556)
Supplement: Supplementary file 1 [file biomedicines-09-00556-s001.zip › Supplementary Tables.xlsx]

## Sheet: S1-diabetes
Shared pathways and targets in diabetes and COVID-19
PPI Hub Proteins (21 genes)
Index	Name	P-value	Adjusted p-value	Odds Ratio	Combined score
1	IRS1	6.947e-28	1.125e-25	349.24	21839.6
2	JAK2	2.477e-16	1.293e-14	120.99	4347.65
3	PTK2	3.192e-16	1.293e-14	117.8	4203.24
4	SYK	6.517e-15	2.112e-13	117.24	3829.44
5	PDGFRB	8.509e-15	2.297e-13	113.63	3681.47
6	RAC1	2.82e-16	1.293e-14	91.24	3266.81
7	JAK1	7.01e-13	1.262e-11	95.44	2670.94
8	SHC1	1.757e-13	4.066e-12	79.81	2344.05
9	GNAI2	3.21e-11	3.932e-10	84.88	2050.89
10	IGF1R	4.259e-13	8.624e-12	71.99	2050.58
Reactome 2016 Pathway (21 genes)
Index	Name	P-value	Adjusted p-value	Odds Ratio	Combined score
1	Fc epsilon receptor (FCERI) signaling Homo sapiens R-HSA-2454202	1.014e-21	2.92e-19	128.94	6233.04
2	PI-3K cascade:FGFR1 Homo sapiens R-HSA-5654689	9.184e-20	3.49e-18	196.89	8630.53
3	PI-3K cascade:FGFR3 Homo sapiens R-HSA-5654710	9.184e-20	3.49e-18	196.89	8630.53
4	PI3K events in ERBB4 signaling Homo sapiens R-HSA-1250342	9.184e-20	3.49e-18	196.89	8630.53
5	PIP3 activates AKT signaling Homo sapiens R-HSA-1257604	9.184e-20	3.49e-18	196.89	8630.53
6	PI-3K cascade:FGFR4 Homo sapiens R-HSA-5654720	9.184e-20	3.49e-18	196.89	8630.53
7	PI-3K cascade:FGFR2 Homo sapiens R-HSA-5654695	9.184e-20	3.49e-18	196.89	8630.53
8	GAB1 signalosome Homo sapiens R-HSA-180292	1.212e-19	3.49e-18	191.68	8348.98
9	PI3K/AKT activation Homo sapiens R-HSA-198203	1.212e-19	3.49e-18	191.68	8348.98
10	Downstream signaling events of B Cell Receptor (BCR) Homo sapiens R-HSA-1168372	1.179e-19	3.49e-18	146.66	6392.05
60	Toll Like Receptor Cascade Homo sapiens R-HSA-168142	2.037e-10	9.46e-10	104.75	2337.51
KEGG 2019 Human pathways (21 genes)
Index	Name	P-value	Adjusted p-value	Odds Ratio	Combined score
1	Type II diabetes mellitus	2.735e-54	4.431e-52	15348.5	1.89298e+06
2	Insulin signaling pathway	3.358e-34	2.72e-32	703.34	54211
3	Insulin resistance	8.406e-28	4.539e-26	423.09	26376.6
4	Pancreatic cancer	1.918e-27	7.766e-26	522.02	32113.9
5	FoxO signaling pathway	1.635e-26	5.296e-25	336.63	19987.5
6	HIF-1 signaling pathway	1.067e-25	2.47e-24	371.55	21363.7
7	Non-alcoholic fatty liver disease (NAFLD)	9.641e-26	2.47e-24	293.99	16933.9
8	Toll-like receptor signaling pathway	1.833e-25	2.7e-24	355.14	20228.4
9	C-type lectin receptor signaling pathway	1.833e-25	2.7e-24	355.14	20228.4
10	Chagas disease (American trypanosomiasis)	1.605e-25	2.7e-24	359.11	20502
11	Central carbon metabolism in cancer	1.357e-25	2.7e-24	501.28	28703.3
12	Fc epsilon RI signaling pathway	2.45e-25	3.307e-24	474.36	26881.2
13	Prolactin signaling pathway	3.576e-25	4.456e-24	457.95	25778.4
14	TNF signaling pathway	3.965e-25	4.588e-24	333.07	18714.5
15	Kaposi sarcoma-associated herpesvirus infection	2.417e-24	2.61e-23	230.31	12524.4
ToppGene-TopFun enriched pathways (21 genes)
Rank	Name	Source	pValue	FDR B&H	FDR B&Y	Bonferroni	Genes from Input	Genes in Annotation
1	Type II diabetes mellitus	MSigDB C2 BIOCARTA (v7.1)	5.905e-54	5.852e-51	4.375e-50	5.852e-51	21	47
2	Type II diabetes mellitus	BioSystems: KEGG	3.289e-50	1.63e-47	1.218e-46	3.259e-47	20	46
3	Insulin signaling pathway	MSigDB C2 BIOCARTA (v7.1)	2.089e-33	6.901e-31	5.16e-30	2.07e-30	18	137
4	Insulin signaling pathway	BioSystems: KEGG	1.106e-30	2.739e-28	2.048e-27	1.096e-27	17	138
5	ErbB2/ErbB3 signaling events	MSigDB C2 BIOCARTA (v7.1)	1.987e-25	3.938e-23	2.944e-22	1.969e-22	12	44
6	Toll-like receptor signaling pathway	MSigDB C2 BIOCARTA (v7.1)	2.519e-25	4.16e-23	3.11e-22	2.496e-22	14	102
7	Pancreatic cancer	MSigDB C2 BIOCARTA (v7.1)	3.18e-25	4.501e-23	3.365e-22	3.151e-22	13	70
8	Insulin resistance	BioSystems: KEGG	5.138e-25	6.365e-23	4.759e-22	5.092e-22	14	107
9	Fc epsilon RI signaling pathway	MSigDB C2 BIOCARTA (v7.1)	1.758e-24	1.936e-22	1.448e-21	1.743e-21	13	79
10	Progesterone-mediated oocyte maturation	MSigDB C2 BIOCARTA (v7.1)	4.905e-24	4.861e-22	3.634e-21	4.861e-21	13	85
11	ErbB signaling pathway	MSigDB C2 BIOCARTA (v7.1)	6.785e-24	6.113e-22	4.57e-21	6.724e-21	13	87
12	FoxO signaling pathway	BioSystems: KEGG	1.142e-23	9.428e-22	7.049e-21	1.131e-20	14	132
,
PPI Hub Proteins (7 common core genes)
Index	Name	P-value	Adjusted p-value	Odds Ratio	Combined score
1	IRS1	1.478e-12	1.848e-10	788.42	21476.9
2	JAK2	6.18e-10	2.919e-08	322.06	6829.15
3	PTK2	7.007e-10	2.919e-08	313.84	6615.54
4	PRKCD	9.462e-10	2.957e-08	295.01	6129.97
5	RAC1	5.913e-09	1.478e-07	202.35	3833.69
6	SYK	7.046e-08	1.468e-06	200.62	3303.79
7	EGFR	1.373e-07	2.451e-06	105.69	1669.99
8	TNFRSF1A	1.854e-07	2.898e-06	156.4	2424.32
9	PRKCE	2.876e-07	3.747e-06	139.71	2104.28
10	SHC1	2.997e-07	3.747e-06	138.23	2076.32
ToppGene-TopFun enriched pathways (7 common core genes)
Rank	Name	Source	pValue	FDR B&H	FDR B&Y	Bonferroni	Genes from Input	Genes in Annotation
1	Type II diabetes mellitus	BioSystems: KEGG	5.632e-18	2.7e-15	1.966e-14	4.596e-15	7	46
2	Type II diabetes mellitus	MSigDB C2 BIOCARTA (v7.1)	6.618e-18	2.7e-15	1.966e-14	5.4e-15	7	47
3	Fc epsilon RI signaling pathway	BioSystems: KEGG	1.02e-16	2.775e-14	2.021e-13	8.324e-14	7	68
4	Fc epsilon RI signaling pathway	MSigDB C2 BIOCARTA (v7.1)	3.05e-16	6.222e-14	4.531e-13	2.489e-13	7	79
5	TRAIL signaling pathway	MSigDB C2 BIOCARTA (v7.1)	4.95e-16	8.078e-14	5.883e-13	4.039e-13	6	28
6	AGE-RAGE signaling pathway in diabetic complications	BioSystems: KEGG	1.566e-15	1.762e-13	1.283e-12	1.278e-12	7	99
7	Chagas disease (American trypanosomiasis)	BioSystems: KEGG	1.943e-15	1.762e-13	1.283e-12	1.586e-12	7	102
8	Toll-like receptor signaling pathway	MSigDB C2 BIOCARTA (v7.1)	1.943e-15	1.762e-13	1.283e-12	1.586e-12	7	102
9	Apoptosis signaling pathway	PantherDB	1.943e-15	1.762e-13	1.283e-12	1.586e-12	7	102
10	Toll-like receptor signaling pathway	BioSystems: KEGG	2.235e-15	1.824e-13	1.328e-12	1.824e-12	7	104
11	TNF signaling pathway	BioSystems: KEGG	2.934e-15	2.176e-13	1.585e-12	2.394e-12	7	108
12	Sphingolipid signaling pathway	BioSystems: KEGG	5.548e-15	3.772e-13	2.747e-12	4.527e-12	7	118
13	ErbB2/ErbB3 signaling events	MSigDB C2 BIOCARTA (v7.1)	9.264e-15	5.815e-13	4.235e-12	7.56e-12	6	44
14	Osteoclast differentiation	BioSystems: KEGG	1.112e-14	6.388e-13	4.652e-12	9.07e-12	7	130
15	Hepatitis C	BioSystems: KEGG	1.174e-14	6.388e-13	4.652e-12	9.582e-12	7	131
ToppGene candidate gene prioritization (7 common core genes)
	Gene Symbol	Gene ID	GO: Molecular Function	GO: Biological Process	GO: Cellular Component	Human Phenotype	Mouse Phenotype	Domain	Pathway	Pubmed	Interaction	Cytoband	Transcription Factor Binding Site	Gene Family	Coexpression	Coexpression Atlas	ToppCell Atlas	Computational	MicroRNA	Drug	Disease	Average score	Overall P-value
Score	pValue	Score	pValue	Score	pValue	Score	pValue	Score	pValue	Score	pValue	Score	pValue	Score	pValue	Score	pValue	Score	pValue	Score	pValue	Score	pValue	Score	pValue	Score	pValue	Score	pValue	Score	pValue	Score	pValue	Score	pValue	Score	pValue
1	TNF	7124	1	1e-06	1	0.04512	0.9281	0.01878	0.5256	0.03447	1	0.02847	0.6508	0.02111	1	0.005809	1	0.04318	1	0.01878	0	0.501	0	0.5004	0	0.5062	1	0.02827	0.9977	0.0184	0.9992	0.006584	0.09593	0.03815	1	0.2097	1	0.08656	1	0.01665	0.7577	9.347e-08
2	MAPK1	5594	0.9999	0.0009682	1	0.04512	0.999	0.001356	0.936	0.02188	1	0.02847	0.9519	0.009876	1	0.005809	1	0.04318	1	0.01878	0	0.501	0	0.5004	0.6572	0.001743	1	0.02866	0.1297	0.1809	0.123	0.1543	0	0.5203	1	0.2097	1	0.08656	1	0.01665	0.7278	7.278e-07
3	MAPK3	5595	0.9999	0.0009682	1	0.04512	0.9246	0.01956			1	0.02847	0.9519	0.009876	1	0.005809	1	0.04318	1	0.01878	0	0.501	0	0.5004	0.6572	0.001743	1	0.03273	0.8569	0.06119	0.3745	0.07281	0	0.5203	1	0.2101	1	0.08656	1	0.01665	0.7647	2.254e-06
4	MAPK8	5599	0.9951	0.005422	1	0.04512	0	0.5525			1	0.02847	0.9932	0.004841	1	0.005809	1	0.04318	1	0.01878	0	0.501	0	0.5004	0.6572	0.001743	0.9999	0.05093	0.3379	0.1398	0.03109	0.2312			1	0.2097	1	0.08656	1	0.01665	0.7067	1.835e-05
5	PIK3CD	5293	0.9849	0.009682	1	0.04512	0.7598	0.03621	0.9981	0.0122	1	0.02847	0.3081	0.02982	1	0.005809	1	0.04318	0.9929	0.04938	0	0.501	0	0.5004	0	0.5062	1	0.02827	0.7879	0.07281	0.8994	0.01995	0	0.5203	1	0.2097	1	0.08656	1	0.01665	0.7229	2.536e-05
6	PIK3CB	5291	0.9954	0.005229	1	0.04512	0.8232	0.02982			1	0.02847	0.3081	0.02982	1	0.005809	1	0.04318	1	0.02382	0	0.501			0	0.5062	0.9996	0.06294	0.9978	0.0182	0.4682	0.05693	0	0.5203	1	0.2097	1	0.08656	1	0.01665	0.7407	3.25e-05
7	PIK3CA	5290	0.9981	0.003098	1	0.04512	0.7598	0.03621	1	0.007746	1	0.02847	0.6291	0.02266	1	0.005809	1	0.04318	1	0.01878	0	0.501	0	0.5004	0	0.5062	1	0.02866	0	0.5935	0.02757	0.2345	0	0.5203	1	0.2097	1	0.08656	1	0.01665	0.6534	4.662e-05
ToppGene candidate gene prioritization ( 21 genes)
	Gene Symbol	Gene ID	GO: Molecular Function	GO: Biological Process	GO: Cellular Component	Human Phenotype	Mouse Phenotype	Domain	Pathway	Pubmed	Interaction	Cytoband	Transcription Factor Binding Site	Gene Family	Coexpression	Coexpression Atlas	ToppCell Atlas	Computational	MicroRNA	Drug	Disease	Average score	Overall P-value
Score			pValue	Score	pValue	Score	pValue	Score	pValue	Score	pValue	Score	pValue	Score	pValue	Score	pValue	Score	pValue	Score	pValue	Score	pValue	Score	pValue	Score	pValue	Score	pValue	Score	pValue	Score	pValue	Score	pValue	Score	pValue	Score	pValue
1	INSR	3643	1	0.0003873	1	0.07881	1	0.002905	0.9999	0.01239	1	0.03428	0.9369	0.006197	1	0.008327	1	0.055	1	0.04144	0	0.5056	0	0.5	0.2012	0.02324	1	0.1412	0.9957	0.0883	0.9233	0.06003	0	0.5351	1	0.2419	1	0.1559	1	0.0275	0.7926	4.177e-06
2	TNF	7124	1	0.0003873	1	0.07881	0.9964	0.0213	0.7202	0.03466	1	0.03428	0	0.5163	1	0.007552	1	0.055	1	0.04144	0.01	0.007359	0	0.5	0	0.513	1	0.1412	1	0.05112	1	0.008521	0.7017	0.02885	1	0.2419	1	0.1559	1	0.0275	0.7662	5.567e-06
3	PIK3R1	5295	1	0.0005809	1	0.07881	0.8437	0.06971	1	0.008521	1	0.03428	0	0.5163	1	0.007552	1	0.055	1	0.04144	0	0.5056	0	0.5	0.3832	0.01414	1	0.1412	1	0.04144	0.9987	0.01704	0.2128	0.06119	1	0.2419	1	0.1559	1	0.0275	0.7639	1.168e-05
4	INS	3630	1	0.0003873	1	0.07881	0.9996	0.0122	0.973	0.02304	1	0.03428	0	0.5163	1	0.007552	1	0.055	0.9969	0.08811	0	0.5056	0	0.5	0.2692	0.02033	1	0.1456	0.6896	0.1764	0.9989	0.01685			0.9247	0.2663	1	0.1559	1	0.0275	0.7803	3.009e-05
5	PKM	5315	1	0.0003873	1	0.07881	0.9927	0.02847			0.9995	0.05461	0	0.5163	0.9938	0.01646	1	0.055	1	0.04144	0	0.5056	0	0.5			1	0.1412	0.9995	0.06952	0.9837	0.03389	0.5149	0.04028	1	0.2419	1	0.1559	1	0.0275	0.7936	0.0001144
6	MAPK1	5594	0.9982	0.01297	1	0.07881	1	0.002517	0.9166	0.02847	1	0.03428	0.5202	0.02285	1	0.007552	1	0.055	1	0.04144	0	0.5056	0	0.5	0	0.513	1	0.1412	0.4464	0.2093	0.7864	0.0914	0	0.5351	1	0.2419	1	0.1559	1	0.0275	0.7332	0.0001309
7	IKBKB	3551	0.9987	0.01065	1	0.07881	0.9994	0.01317	0.9655	0.02343	1	0.03428	0.4546	0.02479	1	0.007552	1	0.055	1	0.04144	0	0.5056	0	0.5			1	0.1412	0.2593	0.2302	0.5726	0.1373	0	0.5351	1	0.2419	1	0.1559	1	0.0275	0.751	0.0001791
8	PIK3CD	5293	0.9114	0.0579	1	0.07881	0.661	0.08734	0.9971	0.0184	1	0.03428	0.06627	0.03098	1	0.007552	1	0.055	0.9957	0.09121	0	0.5056	0	0.5	0	0.513	1	0.1412	0.9582	0.1195	0.9969	0.02246	0.08186	0.0701	1	0.2419	1	0.1559	1	0.0275	0.7309	0.000232
9	HK2	3099	1	0.00213	1	0.07881	0.9594	0.04589			0.9998	0.04899	0	0.5163	0.9208	0.03292	1	0.055	1	0.04802	0	0.5056	0	0.5			1	0.1412	1	0.0366	0.9979	0.01956	0.1757	0.0639	1	0.2419	1	0.1559	1	0.02769	0.7713	0.0002443
10	HK3	3101	1	0.001356	1	0.07881	0.9664	0.04318					0	0.5163	0.8048	0.04744	0.9958	0.1162	0.8448	0.1478	0	0.5056	0	0.5			1	0.1412	1	0.0366	1	0.008521	0.9998	0.003098	1	0.2459	1	0.1559	0.8554	0.1036	0.7951	0.0003024
11	PIK3CB	5291	0.9727	0.03428	1	0.07881	0.9982	0.01685			1	0.03428	0.06627	0.03098	1	0.007552	1	0.055	1	0.04609	0	0.5056			0	0.513	1	0.1412	1	0.0366	0.7818	0.09237	0	0.5351	1	0.2419	1	0.1559	1	0.0275	0.7549	0.0003197
12	MAPK10	5602	0.9937	0.01917	1	0.07881	0.9843	0.03486			0.9948	0.0672	0.4554	0.02479	1	0.007552	1	0.055	1	0.04376	0	0.5056	0	0.5	0	0.513	1	0.1412	0.9948	0.09101	0.7635	0.09508	0.8085	0.02304	1	0.2419	1	0.1559	0.9675	0.07494	0.7775	0.0003445
13	MTOR	2475	0.996	0.01723	1	0.07881	1	0.006197	0.9832	0.02169	1	0.03428	0.06627	0.03098	1	0.007552	1	0.055	1	0.04144	0	0.5056	0	0.5	0	0.513	1	0.1412	0	0.6243	0.4553	0.172	0	0.5351	1	0.2419	1	0.1559	1	0.0275	0.6585	0.0003499
14	MAPK3	5595	0.9993	0.008133	1	0.07881	0.9996	0.0122			1	0.03428	0.5202	0.02285	1	0.007552	1	0.055	1	0.04144	0	0.5056	0	0.5	0	0.513	1	0.1412	0.9773	0.1104	0.5435	0.1464	0	0.5351	1	0.2419	1	0.1559	1	0.0275	0.7251	0.0003504
15	PIK3CG	5294	0.984	0.02537	1	0.07881	0.661	0.08734			1	0.03428	0.06627	0.03098	1	0.007552	1	0.055	1	0.05674	0	0.5056	0	0.5	0	0.513	1	0.1412	1	0.0366	0.9852	0.03292	0	0.5351	1	0.2419	1	0.1559	1	0.0275	0.7142	0.0005098
16	PIK3CA	5290	0.9925	0.02033	1	0.07881	0.7406	0.08017	1	0.008521	1	0.03428	0.06627	0.03098	1	0.007552	1	0.055	1	0.04144	0	0.5056	0	0.5	0	0.513	1	0.1412	0.2025	0.2355	0.1737	0.2504	0	0.5351	1	0.2419	1	0.1559	1	0.0275	0.6604	0.0005169
17	MAPK9	5601	1	0.001356	1	0.07881	0.675	0.08656			1	0.03428	0.4554	0.02479	1	0.007552	1	0.055	1	0.04144	0	0.5056	0	0.5	0	0.513	1	0.1412	0.509	0.2012	0.2537	0.2277	0	0.5351	1	0.2419	1	0.1559	1	0.0275	0.6802	0.0005379
18	PIK3R2	5296	0.9829	0.02692	1	0.07881	0.9098	0.05906	0.9905	0.02053	1	0.04047	0	0.5163	1	0.007552	1	0.055	1	0.04144	0	0.5056	0	0.5	0.3832	0.01414	1	0.145	0.1107	0.2455	0.6283	0.1251	0	0.5351	1	0.2419	1	0.1559	0.9773	0.06971	0.6986	0.0006174
19	MAPK8	5599	0.9976	0.01414	1	0.07881	0.9283	0.055			1	0.03428	0.4554	0.02479	1	0.007552	1	0.055	1	0.04144	0	0.5056	0	0.5	0	0.513	1	0.1412	0.9153	0.1352	0.04018	0.3197			1	0.2419	1	0.1559	1	0.0275	0.7303	0.0007276
20	ADIPOQ	9370	0.9998	0.005229	1	0.07881	0.5197	0.1079			1	0.03428	0	0.5163	0.7031	0.055	1	0.055	0.99	0.1003	0	0.5056			0.2692	0.02033	1	0.1412	0.9894	0.1007	0.6982	0.1094			1	0.2419	1	0.1559	1	0.0275	0.7823	0.0007601
21	PIK3R3	8503	0.7081	0.09663	1	0.07881	0.3344	0.1239					0	0.5163	1	0.007552	1	0.05558	1	0.04144	0	0.5056	0	0.5	0.3832	0.01414	1	0.1412	0.9989	0.07397	0.9576	0.04919	0.225	0.06061	1	0.2419	1	0.1559	0.9992	0.0457	0.705	0.0009455

## Sheet: S2-hypertension
Shared pathways and targets in hypertension and COVID-19
PPI Hub Proteins (13 genes)
Index	Name	P-value	Adjusted p-value	Odds Ratio	Combined score
1	GNAI2	0.07769	0.304	13.46	34.39
2	GNAI3	0.07829	0.304	13.35	34
3	DED1	0.08311	0.304	12.53	31.18
4	HSPA1A	0.09028	0.304	11.48	27.61
5	PCNA	0.09088	0.304	11.4	27.35
6	RUVBL1	0.09147	0.304	11.32	27.09
7	EFT1	0.09147	0.304	11.32	27.09
8	JAK2	0.09859	0.304	10.46	24.23
9	RUVBL2	0.09977	0.304	10.33	23.8
10	RAF1	0.1027	0.304	10.01	22.78
Reactome 2016 Pathway (13 genes)
Index	Name	P-value	Adjusted p-value	Odds Ratio	Combined score
1	Metabolism of Angiotensinogen to Angiotensins Homo sapiens R-HSA-2022377	7.712e-20	2.082e-18	2589.74	113972
2	Peptide hormone metabolism Homo sapiens R-HSA-2980736	2.306e-14	3.112e-13	313.94	9858.11
3	Metabolism of proteins Homo sapiens R-HSA-392499	6.812e-08	6.131e-07	28.4	468.65
4	Peptide ligand-binding receptors Homo sapiens R-HSA-375276	0.0002356	0.00159	31.26	261.11
5	Class A/1 (Rhodopsin-like receptors) Homo sapiens R-HSA-373076	0.001058	0.005715	18.44	126.32
6	GPCR ligand binding Homo sapiens R-HSA-500792	0.002684	0.01208	13.2	78.18
7	G alpha (q) signalling events Homo sapiens R-HSA-416476	0.006603	0.02547	19.05	95.61
8	G alpha (i) signalling events Homo sapiens R-HSA-418594	0.01025	0.0346	15.09	69.1
9	Sialic acid metabolism Homo sapiens R-HSA-4085001	0.02125	0.06314	51.97	200.15
10	GPCR downstream signaling Homo sapiens R-HSA-388396	0.02339	0.06314	5.82	21.85
KEGG 2019 Human pathways (13 genes)
	NA
ToppGene-TopFun enriched pathways (13 genes)
Rank	Name	Source	pValue	FDR B&H	FDR B&Y	Bonferroni	Genes from Input	Genes in Annotation
1	Renin-angiotensin system	BioSystems: KEGG	3.896e-38	4.637e-36	2.485e-35	4.637e-36	13	23
2	Renin-angiotensin system	MSigDB C2 BIOCARTA (v7.1)	2.633e-36	1.567e-34	8.398e-34	3.133e-34	12	17
3	renin-angiotensin system signaling	Pathway Ontology	3.325e-29	1.319e-27	7.071e-27	3.957e-27	10	15
4	Metabolism of Angiotensinogen to Angiotensins	BioSystems: REACTOME	5.72e-18	1.702e-16	9.122e-16	6.807e-16	7	18
5	angiotensin (1-7) signaling	Pathway Ontology	5.046e-16	1.094e-14	5.865e-14	6.004e-14	5	5
6	Angiotensin-converting enzyme 2 regulates heart function	MSigDB C2 BIOCARTA (v7.1)	5.517e-16	1.094e-14	5.865e-14	6.565e-14	6	13
7	angiotensin III signaling	Pathway Ontology	7.012e-13	1.192e-11	6.39e-11	8.345e-11	4	4
8	Peptide hormone metabolism	BioSystems: REACTOME	1.411e-12	2.098e-11	1.125e-10	1.679e-10	7	91
9	Angiotensin II signaling	Pathway Ontology	1.466e-10	1.939e-09	1.039e-08	1.745e-08	4	10
10	Renin secretion	BioSystems: KEGG	4.58e-07	5.451e-06	2.922e-05	5.451e-05	4	65
11	Angiotensin III signaling through the AT1 receptor	Pathway Ontology	9.976e-07	8.48e-06	4.546e-05	0.0001187	2	2
12	Angiotensin II signaling through the AT2 receptor	Pathway Ontology	9.976e-07	8.48e-06	4.546e-05	0.0001187	2	2
PPI Hub Proteins (4 common core genes)
1	DED1	0.02634	0.1198	50.16	182.43
2	EFT1	0.02908	0.1198	45.32	160.33
3	JAK2	0.03142	0.1198	41.85	144.82
4	RAF1	0.03279	0.1198	40.06	136.92
5	HMT1	0.03455	0.1198	37.97	127.8
6	TAF2	0.03552	0.1198	36.9	123.17
7	CDC14	0.0363	0.1198	36.09	119.67
8	RPS3	0.03727	0.1198	35.12	115.53
9	GIM3	0.04038	0.1198	32.34	103.79
10	PLCG1	0.04792	0.1198	27.1	82.33
Reactome 2016 Pathway (4 common core genes)
Index	Name	P-value	Adjusted p-value	Odds Ratio	Combined score
1	Metabolism of Angiotensinogen to Angiotensins Homo sapiens R-HSA-2022377	3.597e-06	3.956e-05	1427.29	17891.8
2	Peptide hormone metabolism Homo sapiens R-HSA-2980736	9.669e-05	0.0005318	252.11	2330.54
3	Metabolism of proteins Homo sapiens R-HSA-392499	0.01608	0.05895	17.65	72.91
4	G alpha (q) signalling events Homo sapiens R-HSA-416476	0.03766	0.0837	34.75	113.94
5	Peptide ligand-binding receptors Homo sapiens R-HSA-375276	0.03805	0.0837	34.38	112.39
6	Class A/1 (Rhodopsin-like receptors) Homo sapiens R-HSA-373076	0.06306	0.1156	20.37	56.29
7	Gastrin-CREB signalling pathway via PKC and MAPK Homo sapiens R-HSA-881907	0.08365	0.1189	15.13	37.54
8	GPCR ligand binding Homo sapiens R-HSA-500792	0.08645	0.1189	14.61	35.77
9	GPCR downstream signaling Homo sapiens R-HSA-388396	0.1826	0.2232	6.45	10.98
10	Signaling by GPCR Homo sapiens R-HSA-372790	0.2346	0.2581	4.83	7
KEGG 2019 Human pathways (4 common core genes)
	NA
ToppGene candidate gene prioritization (4 common core genes)
			GO: Molecular Function	GO: Biological Process	GO: Cellular Component	Human Phenotype	Mouse Phenotype	Domain	Pathway	Pubmed	Interaction	Cytoband	Transcription Factor Binding Site	Gene Family	Coexpression	Coexpression Atlas	ToppCell Atlas	Computational	MicroRNA	Drug	Disease	Average score	Overall P-value
Rank	Gene Symbol	Gene ID	Score	pValue	Score	pValue	Score	pValue	Score	pValue	Score	pValue	Score	pValue	Score	pValue	Score	pValue	Score	pValue	Score	pValue	Score	pValue	Score	pValue	Score	pValue	Score	pValue	Score	pValue	Score	pValue	Score	pValue	Score	pValue	Score	pValue
1	ACE	1636	0.9969	0.01588	1	0.08095	0.9999	0.008908	0.8894	0.02943	1	0.03466	0	0.5139	0.8095	0.05151	1	0.05984	0.9667	0.1133	0	0.507	0	0.5	0.2012	0.02595	1	0.1346	1	0.03273	1	0.005616	0.8822	0.02014	1	0.2244	1	0.1445	1	0.0304	0.7761	4.145e-05
2	AGTR1	185	0.9972	0.0151	1	0.08095	0.4642	0.1187	0.8894	0.02943	1	0.03602	0	0.5139	0.9943	0.02634	1	0.05984	0.9998	0.0672	0	0.507	0	0.5	0	0.5139	1	0.1346	1	0.02943	0.7535	0.0945	0.5605	0.03854	1	0.2244	1	0.1445	1	0.0304	0.7189	0.0005622
3	ACE2	59272	0.9785	0.0304	1	0.08095	0.9984	0.01859			1	0.03466	0	0.5139	0.05944	0.09954	1	0.06022	0.8827	0.1361	0	0.507	0	0.5			1	0.1483	1	0.02943	0.9222	0.05848	0	0.5335	1	0.2244	1	0.1445	1	0.0304	0.6965	0.002216
4	MAS1	4142	0.9504	0.04764	1	0.08095	0.6501	0.09489			1	0.0395	0	0.5139	0	0.5517	0.9996	0.0885	1	0.04841	0	0.507	0	0.5	0	0.5139	0.9997	0.1679	0.9493	0.1141	0.5591	0.1311	0	0.5335	1	0.2244	1	0.1445	1	0.0304	0.6185	0.01478
ToppGene candidate gene prioritization ( 13 genes)
Rank	Gene Symbol	Gene ID	GO: Molecular Function	GO: Biological Process	GO: Cellular Component	Human Phenotype	Mouse Phenotype	Domain	Pathway	Pubmed	Interaction	Cytoband	Transcription Factor Binding Site	Gene Family	Coexpression	Coexpression Atlas	ToppCell Atlas	Computational	MicroRNA	Drug	Disease	Average score	Overall P-value
			Score	pValue	Score	pValue	Score	pValue	Score	pValue	Score	pValue	Score	pValue	Score	pValue	Score	pValue	Score	pValue	Score	pValue	Score	pValue	Score	pValue	Score	pValue	Score	pValue	Score	pValue	Score	pValue	Score	pValue	Score	pValue	Score	pValue
1	AGT	183	1	0.001936	1	0.08811	0.639	0.1005	0.791	0.03389	1	0.03873	0	0.5137	0.9933	0.02304	1	0.06332	0.9998	0.07649	0	0.5068	0	0.5	0.8237	0.0009682	1	0.1398	0.9992	0.0639	0.9975	0.02227	0.9775	0.01259	1	0.2353	1	0.1567	1	0.03292	0.8147	2.09e-05
2	ANPEP	290	0.9179	0.06139	1	0.08811	1	0.006778			1	0.0397	0	0.5137	0.9985	0.0184	1	0.06332	0.659	0.1733	0	0.5068	0	0.5	0.2012	0.02672	1	0.1398	1	0.03098	0.9997	0.01394	1	0.0007746	1	0.2353	1	0.1567	1	0.03292	0.7761	4.959e-05
3	ACE	1636	0.9938	0.02246	1	0.08811	0.9999	0.01007	0.791	0.03389	1	0.03873	0	0.5137	0.8095	0.05267	1	0.06332	0.9345	0.1334	0	0.5068	0	0.5	0.2012	0.02672	1	0.1398	1	0.03292	1	0.00639	0.8822	0.02208	1	0.2353	1	0.1567	1	0.03292	0.7761	7.09e-05
4	MME	4311	0.935	0.05732	1	0.08811	1	0.003679	0	0.5246	1	0.04067	0	0.5137	0.7765	0.05693	1	0.06332	1	0.04919	0	0.5068	0	0.5	0.2012	0.02672	1	0.1398	1	0.03098	0.9959	0.02479	0.8163	0.02517	1	0.2353	1	0.1567	1	0.03292	0.724	0.0002118
5	REN	5972	0.9785	0.03563	1	0.08811	0.1456	0.1611	0.9998	0.01336	1	0.03873	0.8599	0.005809	0.05944	0.1125	1	0.06352	0.4789	0.189	0	0.5068	0	0.5			1	0.14	1	0.03098	0.5473	0.1404	0.09916	0.067	1	0.2405	1	0.1567	1	0.03292	0.7016	0.0004031
6	CTSA	5476	0.9285	0.05906	1	0.08811	1	0.007552	0.9967	0.01878	1	0.04009	0	0.5137	0.9344	0.03544	1	0.06487	1	0.05383	0	0.5068			0	0.5143	1	0.1398	0.9253	0.123	0.9619	0.04512	0.1474	0.06545	1	0.2353	1	0.1567	0.9962	0.06177	0.7759	0.0005197
7	ENPEP	2028	0.5129	0.1222	1	0.09779	0.9999	0.008327	0.01455	0.04919	0	0.5656	0	0.5137	0.05944	0.1125	0.9999	0.08385	0.4279	0.1944	0	0.5068	0	0.5	0.2012	0.02672	1	0.1398	1	0.03098	0.9832	0.03602	0.9937	0.008521	1	0.2353	1	0.1567	1	0.0335	0.6173	0.0006883
8	AGTR1	185	0.9944	0.02227	1	0.08811	0.2154	0.1611	0.791	0.03389	1	0.0397	0	0.5137	0.9943	0.02266	1	0.06332	0.9995	0.08249	0	0.5068	0	0.5	0	0.5143	1	0.1398	1	0.03098	0.7535	0.09469	0.5605	0.03834	1	0.2353	1	0.1567	1	0.03292	0.7189	0.0008887
9	AGTR2	186	0.9973	0.01646	1	0.08811	0.4336	0.134	1	0.008714	1	0.03873	0	0.5137	0.8426	0.04841	1	0.067	0.9825	0.1137	0	0.5068	0	0.5	0	0.5143	1	0.14	1	0.03447	0.5939	0.129	0	0.5341	1	0.2353	1	0.1567	1	0.03292	0.6887	0.001844
10	ACE2	59272	0.9575	0.04686	1	0.08811	0.9968	0.02421			1	0.03873	0	0.5137	0.05944	0.1125	1	0.0639	0.7792	0.16	0	0.5068	0	0.5			1	0.1555	1	0.03098	0.9222	0.05461	0	0.5341	1	0.2353	1	0.1567	1	0.03292	0.6965	0.003523
11	MAS1	4142	0.9032	0.06545	1	0.08811	0.4226	0.1354			1	0.04241	0	0.5137	0	0.5596	0.9996	0.09721	1	0.05848	0	0.5068	0	0.5	0	0.5143	0.9997	0.1704	0.9493	0.1162	0.5591	0.1365	0	0.5341	1	0.2353	1	0.1567	1	0.0335	0.6185	0.02194
12	NLN	57486	0.649	0.1065	1	0.0885	0.771	0.08656			0.8805	0.09741	0	0.5137	0	0.5596	0.934	0.1723	0.9614	0.1251	0	0.5068	0	0.5			1	0.1398	0.9262	0.1228	0.528	0.1452	0	0.5341	1	0.2353	1	0.1567	0.9997	0.04996	0.6505	0.03627
13	MRGPRD	116512	0.05674	0.1712	0	0.6055	0	0.5806			1	0.04067	0	0.5137	0	0.5596	0.9989	0.1057			0	0.5068			0	0.5143	0.1678	0.2649			0.2938	0.2109			0.9998	0.2457	0.9992	0.1743	0	0.5904	0.3529	0.2348

## Sheet: S3-cancer
Shared pathways and targets in cancer and COVID-19
PPI Hub Proteins (Common core 18 genes)
Index	Name	P-value	Adjusted p-value	Odds Ratio	Combined score
1	JAK2	1.711e-19	3.388e-17	210.59	9100.14
2	STAT3	2.148e-16	2.127e-14	135.99	4906.03
3	EGFR	3.733e-16	2.464e-14	85.83	3049.14
4	STAT1	1.341e-15	6.638e-14	152.71	5229.53
5	IRS1	4.108e-15	1.627e-13	134.01	4439.31
6	SYK	1.533e-13	5.06e-12	124.09	3661.34
7	PTK2	6.683e-13	1.89e-11	102.33	2868.81
8	FOS	1.082e-12	2.381e-11	96.08	2647.26
9	PRKCD	1.082e-12	2.381e-11	96.08	2647.26
10	MAPK3	3.109e-12	6.155e-11	62.03	1643.72
Reactome 2016 Pathway (Common core 18 genes)
Index	Name	P-value	Adjusted p-value	Odds Ratio	Combined score
1	Fc epsilon receptor (FCERI) signaling Homo sapiens R-HSA-2454202	4.477e-19	1.303e-16	133.4	5636.3
2	Signaling by Interleukins Homo sapiens R-HSA-449147	4.538e-17	6.603e-15	103.17	3882.37
3	Immune System Homo sapiens R-HSA-168256	2.012e-16	1.739e-14	96.41	3484.58
4	Signalling by NGF Homo sapiens R-HSA-166520	2.391e-16	1.739e-14	89.24	3210.01
5	TRAF6 Mediated Induction of proinflammatory cytokines Homo sapiens R-HSA-168180	8.024e-16	4.67e-14	248.97	8654.11
6	Senescence-Associated Secretory Phenotype (SASP) Homo sapiens R-HSA-2559582	1.407e-15	6.826e-14	230.88	7895.24
7	Toll Like Receptor 10 (TLR10) Cascade Homo sapiens R-HSA-168142	2.379e-15	7.657e-14	215.22	7246.98
8	Toll Like Receptor 5 (TLR5) Cascade Homo sapiens R-HSA-168176	2.379e-15	7.657e-14	215.22	7246.98
9	MyD88 cascade initiated on plasma membrane Homo sapiens R-HSA-975871	2.379e-15	7.657e-14	215.22	7246.98
10	TRAF6 mediated induction of NFkB and MAP kinases upon TLR7/8 or 9 activation Homo sapiens R-HSA-975138	2.631e-15	7.657e-14	212.34	7128.57
MSigDB Hallmark 2020 (Common core 18 genes)
Index	Name	P-value	Adjusted p-value	Odds Ratio	Combined score
1	TNF-alpha Signaling via NF-kB	7.331e-07	6.178e-06	39.03	551.3
2	Interferon Gamma Response	7.331e-07	6.178e-06	39.03	551.3
3	IL-6/JAK/STAT3 Signaling	9.754e-07	6.178e-06	68.5	948.05
4	Hypoxia	2.66e-05	0.0001011	28.84	303.84
5	Inflammatory Response	2.66e-05	0.0001011	28.84	303.84
6	PI3K/AKT/mTOR Signaling	0.0001083	0.0003431	38.98	355.9
7	UV Response Up	0.0003618	0.000982	25.58	202.73
8	Allograft Rejection	0.0007195	0.001519	20.09	145.36
9	Epithelial Mesenchymal Transition	0.0007195	0.001519	20.09	145.36
10	Protein Secretion	0.003318	0.006304	26.45	150.97
ToppGene-TopFun enriched pathways (Common core 18 genes)
Rank	Name	Source	pValue	FDR B&H	FDR B&Y	Bonferroni	Genes from Input	Genes in Annotation
1	Hepatitis B	BioSystems: KEGG	6.052e-30	6.222e-27	4.675e-26	6.222e-27	16	144
2	Pathways in cancer	BioSystems: KEGG	6.638e-28	3.412e-25	2.563e-24	6.824e-25	18	395
3	Toll-like receptor signaling pathway	MSigDB C2 BIOCARTA (v7.1)	6.76e-27	2.316e-24	1.74e-23	6.949e-24	14	102
4	Toll-like receptor signaling pathway	BioSystems: KEGG	9.035e-27	2.322e-24	1.745e-23	9.288e-24	14	104
5	Pathways in cancer	MSigDB C2 BIOCARTA (v7.1)	1.297e-26	2.667e-24	2.003e-23	1.333e-23	17	325
6	Hepatitis C	BioSystems: KEGG	2.759e-25	4.727e-23	3.551e-22	2.836e-22	14	131
7	AGE-RAGE signaling pathway in diabetic complications	BioSystems: KEGG	1.748e-24	2.507e-22	1.883e-21	1.797e-21	13	99
8	Pancreatic cancer	BioSystems: KEGG	1.951e-24	2.507e-22	1.883e-21	2.005e-21	12	64
9	Chagas disease (American trypanosomiasis)	BioSystems: KEGG	2.64e-24	3.016e-22	2.266e-21	2.714e-21	13	102
10	Pancreatic cancer	MSigDB C2 BIOCARTA (v7.1)	6.302e-24	6.479e-22	4.868e-21	6.479e-21	12	70
11	Osteoclast differentiation	BioSystems: KEGG	7.307e-23	6.829e-21	5.13e-20	7.512e-20	13	130
12	Th17 cell differentiation	BioSystems: KEGG	1.444e-21	1.237e-19	9.296e-19	1.485e-18	12	107
13	TNF signaling pathway	BioSystems: KEGG	1.624e-21	1.284e-19	9.65e-19	1.67e-18	12	108
14	Influenza A	BioSystems: KEGG	3.457e-21	2.539e-19	1.907e-18	3.554e-18	13	173
15	T cell activation	PantherDB	6.012e-21	4.12e-19	3.096e-18	6.18e-18	11	76
KEGG 2019 Human pathways (Common core 18 genes)
	NA
ToppGene candidate gene prioritization (Common core 34 genes)
		GO: Molecular Function	GO: Biological Process	GO: Cellular Component	Human Phenotype	Mouse Phenotype	Domain	Pathway	Pubmed	Interaction	Cytoband	Transcription Factor Binding Site	Gene Family	Coexpression	Coexpression Atlas	ToppCell Atlas	Computational	MicroRNA	Drug	Disease	Average score	Overall P-value
Rank	Gene Symbol	Gene ID	Score	pValue	Score	pValue	Score	pValue	Score	pValue	Score	pValue	Score	pValue	Score	pValue	Score	pValue	Score	pValue	Score	pValue	Score	pValue	Score	pValue	Score	pValue	Score	pValue	Score	pValue	Score	pValue	Score	pValue	Score	pValue	Score	pValue
1	IL6	3569	0.9998	0.004454	1	0.06429	0.9257	0.06313	1	0.003292	1	0.02072	0.7842	0.00639	1	0.002517	1	0.04725	0.4439	0.1712	0	0.5058	0	0.5	0.7795	0.002324	1	0.1247	0.9998	0.05112	0.9981	0.02169	0.9404	0.01336	1	0.2382	1	0.1456	1	0.02634	0.849	8.843e-07
2	CXCL8	3576	0.9293	0.04318	1	0.06429	0	0.5771					0	0.512	1	0.002517	1	0.04725	0.9995	0.05364	0	0.5058			0.9065	1e-06	1	0.1247	0.9999	0.04764	0.991	0.03331	0.9937	0.00639	1	0.2382	1	0.1456	1	0.02634	0.8037	4.911e-06
3	EGFR	1956	1	0.001356	1	0.06429	1	0.001743	0.9996	0.006197	1	0.02072	0	0.512	0.9691	0.01394	1	0.04725	1	0.0304	0	0.5058	0	0.5	0	0.511	1	0.1247	1	0.02808	0.9949	0.02692	0.6542	0.03137	1	0.2382	1	0.1456	1	0.02634	0.7703	8.204e-06
4	FOS	2353	0.3006	0.1261	1	0.06429	0.06538	0.1543	0.999	0.006971	1	0.02072	0	0.512	1	0.002517	1	0.04725	1	0.0304	0	0.5058	0	0.5	0.4799	0.00794	1	0.1247	1	0.02789	0.9999	0.01162	0.9994	0.003679	1	0.2382	1	0.1456	1	0.02634	0.7517	9.032e-06
5	PIK3R1	5295	0.9992	0.005035	1	0.06429	0.7876	0.08443	0.9988	0.007165	1	0.02072	0.5615	0.01297	1	0.002517	1	0.04725	1	0.0304	0	0.5058	0	0.5	0	0.511	1	0.1247	0.9999	0.04628	0.9956	0.02537	0.2128	0.05577	1	0.2382	1	0.1456	1	0.02634	0.7715	1.16e-05
6	NFKB1	4790	0.9488	0.03641	1	0.06429	0.9461	0.05558	1	0.003486	1	0.02072	0.5708	0.01278	1	0.002517	1	0.04725	1	0.0304	0	0.5058	0	0.5	0	0.511	1	0.1247	0.2855	0.2213	0.8809	0.06971	0.933	0.01375	1	0.2382	1	0.1456	1	0.02634	0.7854	2.36e-05
7	STAT3	6774	1	0.001356	1	0.06429	0.9899	0.03118	1	0.003486	1	0.02072	0	0.512	1	0.002517	1	0.04725	1	0.0304	0	0.5058	0	0.5	0	0.511	1	0.1247	0.9971	0.07049	0.4967	0.1598	0.5243	0.03466	1	0.2382	1	0.1456	1	0.02634	0.7486	2.747e-05
8	STAT1	6772	0.9947	0.01181	1	0.06429	0.7964	0.08385	1	0.003873	1	0.02072	0	0.512	1	0.002517	1	0.04725	1	0.0304	0	0.5058	0	0.5	0	0.511	1	0.1247	1	0.03408	0.8077	0.08598	0.976	0.01007	1	0.2382	1	0.1456	1	0.02634	0.7771	3.483e-05
9	PRKCB	5579	0.9978	0.006971	1	0.06429	0.9983	0.01665			1	0.02091	0	0.512	0.9999	0.005616	1	0.04725	1	0.0304	0	0.5058	0	0.5	0	0.511	1	0.1247	1	0.02789	1	0.006197	0.5123	0.03524	1	0.2382	1	0.1456	1	0.02634	0.7506	4.952e-05
10	JUN	3725	0.9751	0.02304	1	0.06429	0	0.5771			1	0.02091	0	0.512	1	0.002517	1	0.04725	1	0.0304	0	0.5058	0	0.5	0.4799	0.00794	1	0.1247	1	0.02789	0.9984	0.02091	0.7497	0.02653	1	0.2382	1	0.1456	1	0.02634	0.7342	6.344e-05
11	JAK1	3716	0.9829	0.01936	1	0.06429	0.855	0.07436	1	0.003292	1	0.02072	0	0.512	1	0.002517	1	0.04725	1	0.0304	0	0.5058	0	0.5	0	0.511	1	0.1247	0.9966	0.07242	0.7207	0.1053	0.2128	0.05577	1	0.2382	1	0.1456	1	0.02634	0.7356	9.428e-05
12	IKBKG	8517	0.9918	0.01472	1	0.06429	0.9697	0.04609	0.9998	0.005422	1	0.02072	0	0.512	1	0.002517	1	0.04725	1	0.0304	0	0.5058			0	0.511	1	0.1247	0.2239	0.2306	0.01763	0.3267	0.7998	0.02324	1	0.2382	1	0.1456	1	0.02711	0.7437	0.0001037
13	NFKBIA	4792	0.9257	0.04357	1	0.06429	0	0.5771	0.9523	0.01259	1	0.02072	0	0.512	1	0.002517	1	0.04725	1	0.0304	0	0.5058	0	0.5	0	0.511	1	0.1247	1	0.02827	0.9973	0.02324	0.9183	0.01452	1	0.2382	1	0.1456	1	0.02634	0.7292	0.0001082
14	PRKCA	5578	0.9991	0.006197	1	0.06429	0.9996	0.009295	0	0.5203	0.9989	0.04086	0	0.512	0.9999	0.005035	1	0.04725	1	0.0304	0	0.5058			0	0.511	1	0.1247	1	0.03815	0.9873	0.03699	0.1929	0.05674	1	0.2382	1	0.1456	1	0.02634	0.7325	0.0001172
15	MAPK1	5594	0.99	0.01549	1	0.06429	1	0.001743	0.553	0.02479	1	0.02072	0	0.512	1	0.002517	1	0.04725	1	0.0304	0	0.5058	0	0.5	0	0.511	1	0.1247	0.4464	0.2047	0.597	0.1311	0	0.5318	1	0.2382	1	0.1456	1	0.02634	0.6937	0.0001598
16	PLCG2	5336	0.4414	0.1084	1	0.06429	0	0.5771	0.9923	0.009101	1	0.02072	0	0.512	0.9948	0.009295	1	0.04725	1	0.04222	0	0.5058	0	0.5	0	0.511	1	0.1247	1	0.03815	0.9983	0.0213	0.9325	0.01375	1	0.2382	1	0.1456	1	0.02653	0.7152	0.0002418
17	RELA	5970	0.9337	0.04241	1	0.06429	0.07018	0.1543	0.971	0.01104	1	0.02072	0.06281	0.02266	1	0.002517	1	0.04725	1	0.0304	0	0.5058	0	0.5	0	0.511	1	0.1247	0.6687	0.1789	0.0115	0.3327			1	0.2382	1	0.1456	1	0.02634	0.678	0.0002575
18	IKBKB	3551	0.9913	0.01491	1	0.06429	0.9947	0.02517	0.9523	0.01259	1	0.02072	0	0.512	1	0.002517	1	0.04725	1	0.0304	0	0.5058	0	0.5			1	0.1247	0.2593	0.2258	0.3279	0.2035	0	0.5318	1	0.2382	1	0.1456	1	0.02634	0.725	0.0002728
19	MMP1	4312	0.9711	0.02537	0.9998	0.09682	0.1269	0.1543	0.6067	0.02285			0	0.512	0.9825	0.01143	1	0.04725	0.904	0.1135	0	0.5058	0	0.5	0.2692	0.01801	1	0.1247	0.9739	0.1046	0.526	0.1497	0.996	0.005809	1	0.2382	1	0.1456	1	0.02634	0.7244	0.0003169

## Sheet: S4-CKD
Shared pathways and targets in CKD and COVID-19
PPI Hub Proteins (Common core 32 genes)
Index	Name	P-value	Adjusted p-value	Odds Ratio	Combined score
1	FOS	5.198e-12	5.665e-10	47.25	1227.75
2	EGFR	3.375e-12	5.665e-10	25.73	679.69
3	STAT3	1.33e-11	9.662e-10	42.31	1059.48
4	STAT1	4.058e-11	1.769e-09	50.48	1207.77
5	SYK	3.404e-11	1.769e-09	51.67	1245.35
6	JAK2	1.195e-10	3.723e-09	43.75	999.49
7	AR	1.094e-10	3.723e-09	33	756.89
8	PTK2	1.458e-10	3.974e-09	42.61	965.02
9	PRKCD	2.347e-10	5.685e-09	40.01	887.04
10	JUN	1.137e-09	2.478e-08	32.45	668.41
Reactome 2016 Pathway (Common core 32 genes)
Index	Name	P-value	Adjusted p-value	Odds Ratio	Combined score
1	Immune System Homo sapiens R-HSA-168256	1.083e-25	3.803e-23	65.54	3767.48
2	Innate Immune System Homo sapiens R-HSA-168249	3.472e-22	6.094e-20	46.59	2302.13
3	Cytokine Signaling in Immune system Homo sapiens R-HSA-1280215	3.938e-21	4.608e-19	47.1	2212.81
4	Signaling by Interleukins Homo sapiens R-HSA-449147	1.579e-19	1.386e-17	52.11	2255.81
5	Signalling by NGF Homo sapiens R-HSA-166520	7.508e-14	5.271e-12	30.58	924.12
6	Senescence-Associated Secretory Phenotype (SASP) Homo sapiens R-HSA-2559582	3.241e-13	1.896e-11	96.13	2764.48
7	Fc epsilon receptor (FCERI) signaling Homo sapiens R-HSA-2454202	4.716e-13	2.365e-11	30.68	870.82
8	Signaling by SCF-KIT Homo sapiens R-HSA-1433557	1.677e-12	6.374e-11	32.79	888.97
9	Activation of the AP-1 family of transcription factors Homo sapiens R-HSA-450341	1.893e-12	6.374e-11	739.37	19957.9
10	MyD88-independent TLR3/TLR4 cascade Homo sapiens R-HSA-166166	2.179e-12	6.374e-11	74.45	1999.22
MSigDB Hallmark 2020 (Common core 32 genes)
Index	Name	P-value	Adjusted p-value	Odds Ratio	Combined score
1	Inflammatory Response	1.919e-11	2.59e-10	40.52	999.84
2	Allograft Rejection	1.919e-11	2.59e-10	40.52	999.84
3	TNF-alpha Signaling via NF-kB	7.44e-10	6.696e-09	34.33	721.65
4	IL-6/JAK/STAT3 Signaling	4.706e-09	3.176e-08	56.66	1086.39
5	Interferon Gamma Response	2.451e-08	1.324e-07	28.69	502.75
6	Apoptosis	5.365e-06	2.414e-05	23.52	285.41
7	Complement	1.538e-05	5.931e-05	18.78	208.11
8	Hypoxia	0.0002802	0.0008406	14.41	117.88
9	Apical Junction	0.0002802	0.0008406	14.41	117.88
10	Coagulation	0.001377	0.003718	15.2	100.12
KEGG 2019 Human pathways (Common core 32 genes)
Index	Name	P-value	Adjusted p-value	Odds Ratio	Combined score
1	Chagas disease (American trypanosomiasis)	4.051e-29	2.583e-27	228.52	14939.5
2	Toll-like receptor signaling pathway	4.784e-29	2.583e-27	225.91	14731.5
3	Influenza A	5.741e-32	9.3e-30	190.54	13706.4
4	AGE-RAGE signaling pathway in diabetic complications	5.363e-27	1.737e-25	206.4	12485.1
5	Pertussis	3.824e-24	7.743e-23	216.18	11656.5
6	Hepatitis B	6.669e-28	2.701e-26	153.87	9628.36
7	C-type lectin receptor signaling pathway	1.855e-24	4.292e-23	171.79	9387.08
8	Kaposi sarcoma-associated herpesvirus infection	6.909e-27	1.865e-25	132.77	7997.93
9	Salmonella infection	3.779e-21	5.101e-20	161.3	7585.25
10	Leishmaniasis	9.91e-20	1.147e-18	165.5	7241.93
ToppGene-TopFun enriched pathways (Common core 32 genes)
Rank	Name	Source	pValue	FDR B&H	FDR B&Y	Bonferroni	Genes from Input	Genes in Annotation
1	Influenza A	BioSystems: KEGG	5.118e-28	5.942e-25	4.536e-24	5.942e-25	19	173
2	Chagas disease (American trypanosomiasis)	BioSystems: KEGG	6.024e-26	2.331e-23	1.78e-22	6.994e-23	16	102
3	Toll-like receptor signaling pathway	MSigDB C2 BIOCARTA (v7.1)	6.024e-26	2.331e-23	1.78e-22	6.994e-23	16	102
4	Toll-like receptor signaling pathway	BioSystems: KEGG	8.408e-26	2.44e-23	1.863e-22	9.762e-23	16	104
5	AGE-RAGE signaling pathway in diabetic complications	BioSystems: KEGG	5.01e-24	1.163e-21	8.881e-21	5.816e-21	15	99
6	Hepatitis B	BioSystems: KEGG	2.076e-23	4.017e-21	3.067e-20	2.41e-20	16	144
7	Pertussis	BioSystems: KEGG	1.653e-21	2.741e-19	2.093e-18	1.919e-18	13	76
8	NOD-like receptor signaling pathway	BioSystems: KEGG	2.46e-20	3.571e-18	2.726e-17	2.857e-17	15	170
9	Hepatitis C	BioSystems: KEGG	3.759e-20	4.849e-18	3.702e-17	4.364e-17	14	131
10	Cytokine Signaling in Immune system	BioSystems: REACTOME	5.086e-20	5.904e-18	4.508e-17	5.904e-17	22	763
ToppGene candidate gene prioritization (Common core 32 genes)
		GO: Molecular Function	GO: Biological Process	GO: Cellular Component	Human Phenotype	Mouse Phenotype	Domain	Pathway	Pubmed	Interaction	Cytoband	Transcription Factor Binding Site	Gene Family	Coexpression	Coexpression Atlas	ToppCell Atlas	Computational	MicroRNA	Drug	Disease	Average score	Overall P-value
Rank	Gene Symbol	Gene ID	Score	pValue	Score	pValue	Score	pValue	Score	pValue	Score	pValue	Score	pValue	Score	pValue	Score	pValue	Score	pValue	Score	pValue	Score	pValue	Score	pValue	Score	pValue	Score	pValue	Score	pValue	Score	pValue	Score	pValue	Score	pValue	Score	pValue
1	IFNA1	3439	0.9647	0.02556	1	0.06507	0	0.578					0.9966	1e-06	1	0.006584	1	0.04202	0.9997	0.05655	0.4199	1e-06			0.5368	0.005229	1	0.1228					0	0.5323	1	0.2388	1	0.141	1	0.01433	0.7799	7.04e-08
2	C3	718	0.996	0.008908	1	0.06507	0.999	0.01297	0.9594	0.005035	1	0.01278	0	0.5137	1	0.006584	1	0.04202	1	0.03156	0	0.5043	0	0.5	0.8957	0.0003873	1	0.1222	1	0.02401	1	0.005229	0.9839	0.008521	1	0.2388	1	0.141	1	0.01433	0.8334	3.496e-07
3	EGFR	1956	1	0.0001936	1	0.06507	1	0.001936	0.8773	0.008133	1	0.01278	0.3245	0.02014	1	0.006584	1	0.04202	1	0.03156	0	0.5043	0	0.5	0	0.5122	1	0.1222	1	0.02634	0.9854	0.0335	0.4784	0.0395	1	0.2388	1	0.141	1	0.01433	0.7723	7.919e-07
4	TLR4	7099	0.9989	0.005035	1	0.06507	0.9973	0.01743	0.9991	0.0009682	1	0.01278	0.9547	0.002905	1	0.006584	1	0.04202	1	0.03156	0	0.5043	0	0.5	0.2012	0.02188	1	0.1222	1	0.02401	0.8235	0.07455			1	0.2388	1	0.141	1	0.01433	0.8367	9.23e-07
5	TLR3	7098	0.9012	0.0426	1	0.06507	0.9966	0.01859	0.9991	0.0007746	1	0.01278	0.9547	0.002905	1	0.006584	1	0.04202	1	0.04357	0	0.5043			0.2012	0.02188	1	0.1222	1	0.02401	0.7611	0.08714	0.2799	0.05287	1	0.2388	1	0.141	1	0.01433	0.8448	9.982e-07
6	IL6	3569	0.9968	0.008714	1	0.06507	0.9641	0.04706	0.8661	0.008521	1	0.01278	0.7842	0.006971	1	0.006584	1	0.04202	0.9545	0.1028	0	0.5043	0	0.5	0.5368	0.005229	1	0.1222	0.9995	0.05287	0.9976	0.02111	0.852	0.02014	1	0.2388	1	0.141	1	0.01433	0.8418	1.751e-06
7	MAPK1	5594	0.9976	0.007165	1	0.06507	1	0.001936	0.3529	0.01975	1	0.01278	0.941	0.003292	1	0.006584	1	0.04202	1	0.03156	0	0.5043	0	0.5	0.6572	0.003292	1	0.1222	0.5923	0.1838	0.5466	0.1328	0	0.5323	1	0.2388	1	0.141	1	0.01433	0.7609	2.951e-06
8	MAPK14	1432	0.9986	0.006003	1	0.06507	0.9945	0.02208			1	0.01278	0.9429	0.003098	1	0.006584	1	0.04202	1	0.03156	0	0.5043	0	0.5	0.6572	0.003292	1	0.1222	0.9738	0.09469	0.02812	0.3147	0.9461	0.01336	1	0.2388	1	0.141	1	0.01433	0.8165	4.122e-06
9	CYBB	1536	0.4796	0.1046	1	0.06507	1	0.003098	0.978	0.003679	1	0.01278	0	0.5137	0.9709	0.02479	1	0.04202	0.9309	0.1106	0	0.5043	0	0.5			1	0.1222	1	0.02401	1	0.003292	1	0.0009682	1	0.2388	1	0.141	1	0.01433	0.8004	4.337e-06
10	STAT3	6774	1	0.0003873	1	0.06507	0.9899	0.02905	0.958	0.005035	1	0.01278	0	0.5137	1	0.006584	1	0.04202	1	0.03156	0	0.5043	0	0.5	0.3832	0.0122	1	0.1222	0.9652	0.09818	0.4826	0.1522	0.4126	0.04493	1	0.2388	1	0.141	1	0.01433	0.7593	5.723e-06
11	STAT1	6772	0.9974	0.00794	1	0.06507	0.7964	0.0823	0.9157	0.006778	1	0.01278	0	0.5137	1	0.006584	1	0.04202	1	0.03156	0	0.5043	0	0.5	0.3832	0.0122	1	0.1222	1	0.03176	0.7927	0.08172	0.9356	0.01414	1	0.2388	1	0.141	1	0.01433	0.7902	9.656e-06
12	FOS	2353	0.5482	0.09489	1	0.06507	0.06538	0.1563	0.4299	0.0184	1	0.01278	0	0.5137	1	0.006584	1	0.04202	1	0.03156	0	0.5043	0	0.5	0.4799	0.008133	1	0.1222	1	0.02401	0.9999	0.009489	0.9947	0.006003	1	0.2388	1	0.141	1	0.01433	0.7215	1.125e-05
13	MAPK3	5595	0.9963	0.008908	1	0.06507	0.9992	0.0122			1	0.01278	0.941	0.003292	1	0.006584	1	0.04202	1	0.03156	0	0.5043	0	0.5	0.6572	0.003292	1	0.1222	0.9508	0.1059	0.2954	0.2026	0	0.5323	1	0.2388	1	0.141	1	0.01433	0.784	1.333e-05
14	CCL2	6347	0.9429	0.03369	1	0.06507	0.9922	0.02595	0.9991	0.0007746	1	0.01278	0	0.5137	1	0.008714	1	0.04202	0.3705	0.1857	0	0.5043	0	0.5	0	0.5122	1	0.1222	1	0.02401	0.9999	0.01065	0.9849	0.008133	1	0.2388	1	0.141	1	0.01433	0.7648	1.401e-05
15	VWF	7450	0.9435	0.0335	1	0.0701	0.9992	0.0122	0.7026	0.01162	1	0.01685	0	0.5137	1	0.009682	1	0.04202	0.9682	0.09857	0	0.5043	0	0.5	0	0.5122	1	0.1222	1	0.02421	1	0.007746	0.9566	0.01181	1	0.2388	1	0.141	1	0.01433	0.7677	2.68e-05
16	NFKB1	4790	0.8012	0.06139	1	0.06507	0.9461	0.05325	0.9675	0.004067	1	0.01278	0.06281	0.02672	1	0.006584	1	0.04202	1	0.03156	0	0.5043	0	0.5	0	0.5122	1	0.1222	0.2855	0.2161	0.8809	0.06255	0.9876	0.007746	1	0.2388	1	0.141	1	0.01433	0.7508	2.732e-05
17	NLRP3	114548	0.9908	0.01356	1	0.06507	0.06478	0.1563	0.8762	0.008133	1	0.01278	0	0.5137	0.8994	0.03369	1	0.04202	0.9998	0.0548	0	0.5043			0	0.5122	1	0.1222	1	0.02401	1	0.003873	0.9362	0.01394	1	0.2388	1	0.141	1	0.01433	0.7781	2.778e-05
18	JUN	3725	0.9927	0.01046	1	0.06507	0	0.578			1	0.01375	0	0.5137	1	0.006584	1	0.04202	1	0.03156	0	0.5043	0	0.5	0.4799	0.008133	1	0.1222	1	0.02401	0.9972	0.02169	0.5426	0.03621	1	0.2388	1	0.141	1	0.01433	0.723	4.875e-05
19	IL1B	3553	0.9987	0.006003	1	0.06507	0.621	0.1003	0	0.5151	1	0.01278	0	0.5137	1	0.006584	1	0.04202	0.9988	0.06584	0	0.5043	0	0.5	0	0.5122	1	0.1222	1	0.02401	1	0.003292	0.9807	0.008714	1	0.2388	1	0.141	1	0.01433	0.7246	5.152e-05
20	F2	2147	0.9203	0.03892	1	0.06507	0.9684	0.04493	0.9939	0.002517	1	0.01491	0	0.5137	1	0.006584	1	0.04202	0.9993	0.06158	0	0.5043	0	0.5	0	0.5122	1	0.1222	0.9868	0.08404	0.9434	0.04706	0.9535	0.01259	1	0.2388	1	0.141	1	0.01433	0.7798	5.357e-05
21	ADAM17	6868	0.996	0.008908	1	0.06507	0.9994	0.0122	0.4924	0.01607	1	0.01278	0	0.5137	0.9999	0.01026	1	0.04202	0.9985	0.067	0	0.5043	0	0.5	0.2012	0.02188	1	0.1222	0.5324	0.1904	0.5204	0.1412	0	0.5323	1	0.2388	1	0.141	1	0.01433	0.6916	0.000105
22	PIK3CD	5293	0.9547	0.02963	1	0.06507	0.661	0.09682	0.9063	0.006971	1	0.01278	0	0.5137	1	0.006584	1	0.04202	0.9829	0.09024	0	0.5043	0	0.5	0	0.5122	1	0.1222	0.952	0.1055	0.9744	0.03815	0.08186	0.06274	1	0.2388	1	0.141	1	0.01433	0.7216	0.0001691
23	PIK3CA	5290	0.9942	0.009876	1	0.06507	0.7406	0.08656	1	0.0003873	1	0.01627	0	0.5137	1	0.006584	1	0.04202	1	0.03156	0	0.5043	0	0.5	0	0.5122	1	0.1222	0.1138	0.237	0.02323	0.3195	0	0.5323	1	0.2388	1	0.141	1	0.01433	0.6497	0.0001786
24	DDX58	23586	0.9954	0.009489	1	0.06507	0.9021	0.06526	0.1081	0.02459	1	0.01278	0	0.5137	1	0.007165	1	0.04202	1	0.03156	0	0.5043	0	0.5	0	0.5122	1	0.1222	1	0.02576	0.1045	0.2624	0	0.5323	1	0.2388	1	0.141	1	0.01433	0.6514	0.0002716
25	CASP1	834	0.9973	0.00794	1	0.06507	0	0.578					0	0.5137	0.9995	0.01297	1	0.04396	1	0.04086	0	0.5043	0	0.5	0	0.5122	1	0.1222	0.9998	0.04435	0.9187	0.05403	0.9999	0.001356	1	0.2388	1	0.141	1	0.01433	0.7033	0.0003576
26	CSF3	1440	0.9052	0.04241	1	0.06507	0	0.578			0.9999	0.01898	0.7842	0.006971	0.9903	0.02033	1	0.04202	0.2904	0.1946	0	0.5043	0	0.5	0	0.5122	1	0.1222	0.7405	0.1582	0.8943	0.05964	0.987	0.007746	1	0.2388	1	0.141	1	0.01433	0.7231	0.0003648
27	PIK3CB	5291	0.9863	0.01491	1	0.06507	0.9299	0.05751			0.9999	0.02033	0	0.5137	1	0.006584	1	0.04202	1	0.03931	0	0.5043			0	0.5122	1	0.1222	1	0.02401	0.6111	0.1195	0	0.5323	1	0.2388	1	0.141	1	0.01433	0.749	0.0004252
28	CSF2	1437	0.9052	0.04241	1	0.06507	0	0.578			1	0.01278	0.7842	0.006971	1	0.006584	1	0.04202	0.9793	0.09198	0	0.5043	0	0.5			1	0.1222	0.7949	0.1493	0.9564	0.04454	0	0.5323	1	0.2388	1	0.141	1	0.01433	0.7381	0.0004633
29	IL2	3558	0.986	0.0151	1	0.06507	0	0.578			1	0.01278	0.7842	0.006971	1	0.006584	1	0.04202	0.9212	0.1125	0	0.5043	0	0.5	0	0.5122	1	0.1222	0.07324	0.2374	0.9149	0.055	0	0.5323	1	0.2388	1	0.141	1	0.01433	0.6643	0.0005901
30	ACE2	59272	0.9896	0.01394	1	0.06507	0.9629	0.04725			1	0.01278	0	0.5137	0.9091	0.03215	1	0.04202	0.6336	0.1559	0	0.5043	0	0.5			0.9998	0.1561	1	0.02401	0.8162	0.07591	0	0.5323	1	0.2388	1	0.141	1	0.01433	0.7426	0.0008294
31	CXCL8	3576	0.858	0.05306	1	0.06507	0	0.578					0	0.5137	1	0.006584	1	0.04202	0.9923	0.08211	0	0.5043			0	0.5122	1	0.1222	0.9995	0.05287	0.9875	0.03311	0.7601	0.02537	1	0.2388	1	0.141	1	0.01433	0.7255	0.001205
32	MAS1	4142	0.9349	0.03718	1	0.06507	0.4226	0.1245			0.9913	0.03641	0	0.5137	0.9071	0.03215	0.9975	0.09237	0.9977	0.07204	0	0.5043	0	0.5	0	0.5122	0.9932	0.1911	0.934	0.1123	0.2882	0.2041	0	0.5323	1	0.2388	1	0.141	0.9995	0.02885	0.6683	0.00798

## Sheet: S5-CVD
Shared pathways and targets in CVD and COVID-19
PPI Hub Proteins (Common core 39 genes)
Index	Name	P-value	Adjusted p-value	Odds Ratio	Combined score
1	STAT3	6.342e-14	1.37e-11	42.93	1304.67
2	EGFR	2.428e-12	2.622e-10	21.48	574.55
3	STAT1	5.168e-12	3.721e-10	45.76	1189.33
4	IRS1	1.556e-11	7.537e-10	40.16	999.46
5	JAK2	1.745e-11	7.537e-10	39.62	981.51
6	AR	2.718e-11	9.786e-10	29.2	710.3
7	RAC1	3.458e-11	1.067e-09	28.45	685.41
8	MAPK1	2.121e-10	5.726e-09	19.46	433.45
9	HSP90AA1	4.907e-10	1.06e-08	26.67	571.77
10	MAPK3	4.824e-10	1.06e-08	21.44	459.88
Reactome 2016 Pathway (Common core 39 genes)
Index	Name	P-value	Adjusted p-value	Odds Ratio	Combined score
1	Immune System Homo sapiens R-HSA-168256	8.787e-28	3.26e-25	47.15	2937.2
2	Innate Immune System Homo sapiens R-HSA-168249	1.294e-22	2.401e-20	35.16	1772.12
3	Cytokine Signaling in Immune system Homo sapiens R-HSA-1280215	1.863e-17	2.304e-15	27.56	1061.81
4	Signaling by Interleukins Homo sapiens R-HSA-449147	3.037e-16	2.817e-14	32.47	1160.05
5	Activation of the AP-1 family of transcription factors Homo sapiens R-HSA-450341	7.666e-15	5.688e-13	907.14	29483.7
6	MyD88:Mal cascade initiated on plasma membrane Homo sapiens R-HSA-166058	1.168e-13	4.333e-12	71.85	2139.53
7	Toll Like Receptor TLR1:TLR2 Cascade Homo sapiens R-HSA-168179	1.168e-13	4.333e-12	71.85	2139.53
8	Toll Like Receptor TLR6:TLR2 Cascade Homo sapiens R-HSA-168188	1.168e-13	4.333e-12	71.85	2139.53
9	Toll Like Receptor 2 (TLR2) Cascade Homo sapiens R-HSA-181438	1.168e-13	4.333e-12	71.85	2139.53
10	Toll-Like Receptors Cascades Homo sapiens R-HSA-168898	1.09e-13	4.333e-12	52.6	1570.03
MSigDB Hallmark 2020 (Common core 39 genes)
Index	Name	P-value	Adjusted p-value	Odds Ratio	Combined score
1	Inflammatory Response	9.951e-14	2.886e-12	41.1	1230.42
2	TNF-alpha Signaling via NF-kB	1.365e-10	1.319e-09	31.05	705.35
3	Allograft Rejection	1.365e-10	1.319e-09	31.05	705.35
4	IL-6/JAK/STAT3 Signaling	3.166e-10	2.295e-09	54.36	1189.09
5	Interferon Gamma Response	4.099e-09	2.377e-08	26.57	513.16
6	Coagulation	2.617e-07	1.265e-06	27.31	413.95
7	Apoptosis	6.491e-07	2.689e-06	23.23	331.02
8	Complement	2.299e-06	7.408e-06	18.53	240.52
9	KRAS Signaling Up	2.299e-06	7.408e-06	18.53	240.52
10	Hypoxia	0.0006069	0.0016	11.52	85.37
KEGG 2019 Human pathways (Common core 39 genes)
Index	Name	P-value	Adjusted p-value	Odds Ratio	Combined score
1	Chagas disease (American trypanosomiasis)	3.647e-34	6.126e-32	224.8	17308.2
2	Toll-like receptor signaling pathway	9.329e-32	7.837e-30	198.09	14153.4
3	AGE-RAGE signaling pathway in diabetic complications	8.484e-30	4.549e-28	185.06	12388
4	Influenza A	1.083e-29	4.549e-28	123.81	8257.28
5	Pertussis	2.67e-27	8.97e-26	203.89	12475.8
6	TNF signaling pathway	1.064e-24	2.978e-23	130.7	7214.53
7	Hepatitis B	5.718e-24	1.372e-22	93.77	5018.23
8	IL-17 signaling pathway	1.089e-23	2.287e-22	140.94	7451.88
9	C-type lectin receptor signaling pathway	5.763e-23	1.076e-21	123.64	6331.45
10	NOD-like receptor signaling pathway	1.993e-21	3.349e-20	75.91	3618.33
ToppGene-TopFun enriched pathways (Common core 39 genes)
	Name	Source	pValue	FDR B&H	FDR B&Y	Bonferroni	Genes from Input	Genes in Annotation
1	Chagas disease (American trypanosomiasis)	BioSystems: KEGG	2.126e-30	2.596e-27	1.995e-26	2.596e-27	19	102
2	Toll-like receptor signaling pathway	MSigDB C2 BIOCARTA (v7.1)	2.839e-28	1.688e-25	1.297e-24	3.467e-25	18	102
3	Toll-like receptor signaling pathway	BioSystems: KEGG	4.147e-28	1.688e-25	1.297e-24	5.064e-25	18	104
4	AGE-RAGE signaling pathway in diabetic complications	BioSystems: KEGG	1.959e-26	5.98e-24	4.596e-23	2.392e-23	17	99
5	Influenza A	BioSystems: KEGG	9.35e-26	2.283e-23	1.755e-22	1.142e-22	19	173
6	Pertussis	BioSystems: KEGG	2.929e-24	5.961e-22	4.581e-21	3.576e-21	15	76
7	TNF signaling pathway	BioSystems: KEGG	8.521e-22	1.486e-19	1.142e-18	1.04e-18	15	108
8	IL-17 signaling pathway	BioSystems: KEGG	7.361e-21	1.123e-18	8.634e-18	8.988e-18	14	93
9	Hepatitis B	BioSystems: KEGG	7.777e-20	1.055e-17	8.108e-17	9.496e-17	15	144
10	NOD-like receptor signaling pathway	MSigDB C2 BIOCARTA (v7.1)	2.503e-19	3.056e-17	2.349e-16	3.056e-16	12	62
ToppGene candidate gene prioritization (Common core 39 genes)
		GO: Molecular Function	GO: Biological Process	GO: Cellular Component	Human Phenotype	Mouse Phenotype	Domain	Pathway	Pubmed	Interaction	Cytoband	Transcription Factor Binding Site	Gene Family	Coexpression	Coexpression Atlas	ToppCell Atlas	Computational	MicroRNA	Drug	Disease	Average score	Overall P-value
Rank	Gene Symbol	Gene ID	Score	pValue	Score	pValue	Score	pValue	Score	pValue	Score	pValue	Score	pValue	Score	pValue	Score	pValue	Score	pValue	Score	pValue	Score	pValue	Score	pValue	Score	pValue	Score	pValue	Score	pValue	Score	pValue	Score	pValue	Score	pValue	Score	pValue
1	C3	718	0.9649	0.02304	1	0.03466	0.999	0.009682	0.9389	0.002711	1	0.005616	0	0.5128	1	0.004841	1	0.03253	1	0.03021	0	0.5029	0	0.5	0.8957	1e-06	1	0.1028	1	0.02053	1	0.006778	0.982	0.008133	1	0.2393	1	0.1156	0.9997	0.01123	0.8306	1.318e-08
2	CFB	629	0.8377	0.04919	0.9998	0.05655	0.2476	0.1296	0.8964	0.003486	1	0.007746	0	0.5128	0.9994	0.009489	1	0.03253	0.9098	0.109	0	0.5029			0.8706	1e-06	1	0.1028	1	0.02053	0.9795	0.03273	0.9936	0.005422	0.9997	0.2506	1	0.1156	0.9743	0.02653	0.8348	2.214e-07
3	EGFR	1956	1	0.0009682	1	0.03466	1	0.0009682	0.732	0.009682	1	0.005616	0.3245	0.02053	1	0.004841	1	0.03253	1	0.02672	0	0.5029	0	0.5	0	0.5149	1	0.1028	0.9996	0.04551	0.9841	0.0304	0.3218	0.03873	1	0.2393	1	0.1156	1	0.006197	0.7563	3.965e-07
4	IL6	3569	0.9895	0.009295	1	0.03466	0.9432	0.04338	0.3172	0.01588	1	0.005616	0.7842	0.003486	1	0.004841	1	0.03253	0.927	0.1021	0	0.5029	0	0.5	0.5368	0.007552	1	0.1028	0.9951	0.06274	0.9958	0.02227	0.68	0.02227	1	0.2393	1	0.1156	1	0.006197	0.802	6.603e-07
5	TLR2	7097	0.9438	0.03098	1	0.03466	0.9997	0.005035	0.1081	0.03021	1	0.005616	0	0.5128	1	0.004841	1	0.03253	0.9998	0.04551	0	0.5029			0.2012	0.02827	1	0.1028	1	0.02072	0.9999	0.01084	0.9991	0.003873	1	0.2393	1	0.1156	1	0.006197	0.7918	8.091e-07
6	MAPK14	1432	0.9985	0.003679	1	0.03466	0.9945	0.01472			1	0.005809	0.4864	0.01491	1	0.004841	1	0.03253	1	0.02672	0	0.5029	0	0.5	0.6572	0.00426	1	0.1028	0.9865	0.07494	0.02812	0.3079	0.9647	0.01007	1	0.2393	1	0.1156	1	0.006197	0.7925	1.372e-06
7	MAPK1	5594	0.995	0.005809	1	0.03466	1	0.0009682	0.225	0.01975	0.9999	0.01065	0.4861	0.01491	1	0.004841	1	0.03253	1	0.02672	0	0.5029	0	0.5	0.6572	0.00426	1	0.1028	0.4464	0.1892	0.454	0.147	0	0.5275	1	0.2393	1	0.1156	1	0.006197	0.7213	1.542e-06
8	STAT3	6774	1	0.0009682	1	0.03466	0.9899	0.02033	0.8964	0.003486	1	0.005616	0	0.5128	1	0.004841	1	0.03253	1	0.02672	0	0.5029	0	0.5	0.3832	0.01472	1	0.1028	0.8859	0.1183	0.446	0.1491	0.4126	0.03331	1	0.2393	1	0.1156	1	0.006197	0.7524	1.813e-06
9	CYBB	1536	0.4796	0.09566	1	0.03466	1	0.001549	0.8964	0.003486	1	0.005616	0	0.5128	0.9624	0.01762	1	0.03389	0.9015	0.1115	0	0.5029	0	0.5			1	0.1028	1	0.02053	1	0.005035	0.9999	0.002711	1	0.2393	1	0.1156	0.9998	0.01084	0.7948	1.928e-06
10	TLR4	7099	0.9947	0.006003	1	0.03466	0.9928	0.01646	0.9241	0.003098	1	0.005616	0	0.5128	1	0.004841	1	0.03253	1	0.02711	0	0.5029	0	0.5	0.2012	0.02827	1	0.1028	1	0.02053	0.808	0.07262			1	0.2393	1	0.1156	1	0.006197	0.7786	2.992e-06
11	NLRP3	114548	0.9847	0.01201	1	0.03466	0	0.5689	0.721	0.01007	1	0.005616	0.5421	0.01162	0.8994	0.02266	1	0.03253	1	0.03873	0	0.5029			0	0.5149	1	0.1028	1	0.02053	1	0.005229	0.9362	0.01181	1	0.2393	1	0.1156	1	0.006197	0.7851	3.051e-06
12	TNF	7124	0.9993	0.002711	1	0.03466	0.992	0.01801	0.225	0.01975	1	0.005616	0	0.5128	1	0.004841	1	0.03253	1	0.02672	0	0.5029	0	0.5	0	0.5149	1	0.1028	0.9995	0.04648	0.9998	0.01201	0.5888	0.02595	1	0.2393	1	0.1156	1	0.006197	0.7268	4.517e-06
13	CCL2	6347	0.9829	0.01278	1	0.03466	0.9614	0.03486	0.9959	0.001549	1	0.005616	0	0.5128	0.9974	0.01181	1	0.03253	0.6813	0.146	0	0.5029	0	0.5	0	0.5149	1	0.1028	1	0.02053	0.9998	0.01201	0.9678	0.009682	1	0.2393	1	0.1156	1	0.006197	0.7764	5.323e-06
14	MAPK8	5599	0.9975	0.004454	1	0.03466	0.6704	0.07688			1	0.006584	0.8632	0.002517	1	0.004841	1	0.03253	1	0.02672	0	0.5029	0	0.5	0.6572	0.00426	1	0.1028	0.7029	0.1526	0.001614	0.328			1	0.2393	1	0.1156	1	0.006197	0.7774	5.68e-06
15	IL6R	3570	0.9581	0.0244	1	0.03466	0.931	0.04609			1	0.007746	0.5189	0.01278	0.9959	0.01239	1	0.03253	0.9144	0.1069	0	0.5029	0	0.5	0.468	0.01162	1	0.1028	1	0.03195	0.9993	0.01588	0.5849	0.02614	1	0.2393	1	0.1156	1	0.007746	0.8027	5.724e-06
16	NFKB1	4790	0.8012	0.05635	1	0.03466	0.9461	0.0428	0.8964	0.003486	1	0.005616	0.5708	0.01026	1	0.004841	1	0.03253	1	0.02672	0	0.5029	0	0.5	0	0.5149	1	0.1028	0.2855	0.2078	0.8998	0.05577	0.4771	0.0304	1	0.2393	1	0.1156	1	0.006197	0.7474	7.62e-06
17	MAPK3	5595	0.9923	0.007359	1	0.03466	0.9945	0.01472			1	0.008908	0.4861	0.01491	1	0.004841	1	0.03253	1	0.02672	0	0.5029	0	0.5	0.6572	0.00426	1	0.1028	0.9109	0.111	0.2495	0.2022	0	0.5275	1	0.2393	1	0.1156	1	0.006197	0.7548	8.851e-06
18	CASP1	834	0.9954	0.005616	1	0.03466	0	0.5689					0.5421	0.01162	0.9995	0.009489	1	0.03505	1	0.03195	0	0.5029	0	0.5	0.5454	0.006971	1	0.1028	0.992	0.06816	0.9098	0.05461	0.9967	0.004648	1	0.2393	1	0.1156	1	0.006197	0.7664	1.293e-05
19	FOS	2353	0.2549	0.1216	1	0.03486	0.06538	0.1381	0.3172	0.01588	1	0.005616	0	0.5128	1	0.004841	1	0.03253	1	0.02692	0	0.5029	0	0.5	0	0.5149	1	0.1028	1	0.02053	0.9998	0.01123	0.9943	0.005229	1	0.2393	1	0.1156	1	0.006197	0.6748	1.402e-05
20	IL1B	3553	0.9975	0.00426	1	0.03466	0.621	0.08017	0	0.5151	1	0.005616	0	0.5128	1	0.004841	1	0.03253	0.9977	0.061	0	0.5029	0	0.5	0	0.5149	1	0.1028	1	0.02053	1	0.005035	0.68	0.02227	1	0.2393	1	0.1156	1	0.006197	0.7087	2.031e-05
21	TLR8	51311	0.8014	0.05635	1	0.03466	0.9944	0.01472			1	0.005616	0	0.5128	0.9933	0.01317	1	0.03253	0.1166	0.2068	0	0.5029	0	0.5	0.2012	0.02827	1	0.1028	1	0.0273	0.9964	0.02188	0.9856	0.007552	1	0.2393	1	0.1156	0.9996	0.01143	0.7401	2.419e-05
22	VWF	7450	0.9435	0.03098	0.9999	0.05015	0.9894	0.02053	0.1189	0.0273	0.9994	0.01278	0	0.5128	0.9997	0.009101	1	0.03253	0.9725	0.08714	0	0.5029	0	0.5	0	0.5149	1	0.1028	1	0.02091	0.9999	0.01046	0.9482	0.01084	1	0.2393	1	0.1156	0.9995	0.01181	0.7363	2.456e-05
23	ADAM17	6868	0.9852	0.01181	1	0.03466	0.9969	0.01239	0.5589	0.01259	1	0.005809	0	0.5128	0.9978	0.01181	1	0.03834	0.9968	0.06274	0	0.5029	0	0.5	0.2012	0.02827	1	0.1028	0.4038	0.196	0.5204	0.1286	0	0.5275	1	0.2393	1	0.1156	1	0.006971	0.6894	4.77e-05
24	EIF2AK2	5610	0.9989	0.002905	1	0.03466	0.7381	0.07146			1	0.006778	0.4857	0.0153	0.9997	0.009295	1	0.03253	1	0.02672	0	0.5029			0	0.5149	1	0.1028	0.9603	0.0916	0.4261	0.1516	0	0.5275	1	0.2393	1	0.1156	0.9998	0.01084	0.7633	5.24e-05
25	CXCL10	3627	0.9915	0.008133	1	0.03466	0.7201	0.07455			1	0.005616	0	0.5128	0.9958	0.01239	1	0.03253	0.4624	0.17	0	0.5029	0	0.5	0	0.5149	1	0.1028	1	0.02053	0.9852	0.03002	0.9111	0.01278	1	0.2393	1	0.1156	1	0.006197	0.7456	5.416e-05
26	JUN	3725	0.9964	0.005229	1	0.03466	0	0.5689			0.935	0.02982	0	0.5128	1	0.004841	1	0.03253	1	0.02672	0	0.5029	0	0.5	0	0.5149	1	0.1028	1	0.02053	0.9953	0.02304	0.6229	0.02537	1	0.2393	1	0.1156	1	0.006197	0.6991	7.394e-05
27	FGG	2266	0.8826	0.04376	1	0.03466	0.9991	0.009489	0.2142	0.02634	0.9899	0.02169	0	0.5128	1	0.004841	1	0.03253	0.9999	0.0397	0	0.5029	0	0.5	0	0.5149	1	0.1028	0.9937	0.06565	0.9804	0.03195	0.5851	0.02614	1	0.2393	1	0.1156	0.5598	0.07727	0.7059	7.737e-05
28	F2	2147	0.8825	0.04376	1	0.03466	0.8958	0.05519	0.568	0.01104	0.9988	0.01414	0	0.5128	0.9977	0.01181	1	0.03273	0.9995	0.05132	0	0.5029	0	0.5	0	0.5149	1	0.1044	0.9435	0.09954	0.9151	0.05345	0.6022	0.02576	1	0.2393	1	0.1156	1	0.006197	0.7329	7.804e-05
29	PIK3CD	5293	0.9547	0.02556	1	0.03466	0.661	0.07688	0.8363	0.006778	1	0.005616	0	0.5128	1	0.004841	1	0.03273	0.9829	0.07901	0	0.5029	0	0.5	0	0.5149	1	0.1028	0.9351	0.1019	0.9551	0.04163	0	0.5275	1	0.2393	1	0.1156	1	0.006197	0.7126	9.918e-05
30	PIK3CA	5290	0.9942	0.006197	1	0.03466	0.7406	0.07088	0.9971	0.001549	0.9919	0.02053	0	0.5128	1	0.004841	1	0.03253	1	0.02672	0	0.5029	0	0.5	0	0.5149	1	0.1028	0.04331	0.2347	0.02323	0.3116	0	0.5275	1	0.2393	1	0.1156	1	0.006197	0.6425	0.0001019
31	CSF3	1440	0.8139	0.05461	1	0.03466	0	0.5689			0.9996	0.01201	0.7842	0.003486	0.9942	0.01297	1	0.03466	0.2904	0.1896	0	0.5029	0	0.5	0	0.5149	1	0.1028	0.7784	0.1385	0.8822	0.05926	0.9719	0.009489	1	0.2393	1	0.1156	1	0.006197	0.7182	0.000117
32	PIK3CB	5291	0.9863	0.01104	1	0.03466	0.7924	0.06642			0.9606	0.0273	0	0.5128	1	0.004841	1	0.03253	1	0.03737	0	0.5029			0	0.5149	1	0.1028	1	0.02053	0.6021	0.1108	0	0.5275	1	0.2393	1	0.1156	1	0.006197	0.7431	0.0001777
33	ACE	1636	0.9706	0.01801	1	0.03466	0.9597	0.03505	0	0.5151	0.9967	0.01762	0	0.5128	0.1997	0.06216	1	0.03311	0.7067	0.1431	0	0.5029	0	0.5	0.2012	0.02827	1	0.1034	1	0.02943	0.9999	0.01026	0	0.5275	1	0.2393	1	0.1156	1	0.006197	0.6546	0.0001924
34	CXCL8	3576	0.858	0.04744	1	0.03466	0	0.5689					0	0.5128	1	0.004841	1	0.03253	0.9816	0.08056	0	0.5029			0	0.5149	1	0.1028	0.9962	0.061	0.9814	0.03137	0.7071	0.02091	1	0.2393	1	0.1156	1	0.006197	0.7215	0.0004946
35	MBL2	4153	0.5522	0.08869	1	0.03486	0.09063	0.1381			1	0.007165	0	0.5128	0.9981	0.01181	1	0.03253	0.8641	0.1187	0	0.5029	0	0.5	0	0.5149	1	0.1259	0.614	0.1658	0.8716	0.06042	0	0.5275	1	0.2393	1	0.1156	1	0.006197	0.6388	0.001344
36	ACE2	59272	0.9266	0.03447	1	0.03563	0.8882	0.05558			1	0.005616	0	0.5128	0.003533	0.09373	0.9849	0.1046	0.6336	0.1514	0	0.5029	0	0.5			0.9987	0.1563	1	0.03156	0.755	0.08404	0	0.5275	1	0.2393	1	0.1156	0.9991	0.01317	0.6815	0.001435
37	AGTR1	185	0.8453	0.04861	1	0.03466	0.2154	0.1381	0	0.5151	0.8235	0.03834	0	0.5128	0.3891	0.05325	0.8621	0.1629	0.8578	0.1199	0	0.5029	0	0.5	0	0.5149	1	0.1032	0.9997	0.04396	0.4793	0.1408	0.1382	0.05112	1	0.2393	1	0.1156	0.9989	0.01336	0.6066	0.003171
38	MASP1	5648	0.7995	0.05655	0.9995	0.06448	0	0.5689	0	0.5151	0.2742	0.06739	0	0.5128	0.9985	0.01104	1	0.03757	0.9707	0.0883	0	0.5029	0	0.5	0.4596	0.01162	1	0.1253	0.9982	0.05558	0.348	0.1737			1	0.2393	1	0.1156	0	0.5651	0.5753	0.005036
39	MAS1	4142	0.9349	0.03408	1	0.03563	0.4226	0.11			0.5355	0.05093	0	0.5128	0	0.5469	0.5818	0.2043	0.9998	0.04551	0	0.5029	0	0.5	0	0.5149	0.9892	0.1797	0.876	0.1206	0.3366	0.1774	0	0.5275	1	0.2393	1	0.1156	0.9159	0.03931	0.586	0.01709

## Sheet: S6-Hub-Genes
Hub gene based target analysis
Diabetes	Hypertension	Cancer	CKD	CVD		Targets for individual and combinations of comorbidities
IRS1	GNAI2	JAK2	FOS	STAT3		Diabets	PDGFRB, JAK1, SHC1, IGF1R
JAK2	GNAI3	STAT3	EGFR	EGFR		Hypertension	GNAI3, DED1, HSPA1A, PCNA, RUVBL1, EFT1, RUVBL2, RAF1
PTK2	DED1	EGFR	STAT3	STAT1		Cancer	0
SYK	HSPA1A	STAT1	STAT1	IRS1		CKD	JUN
PDGFRB	PCNA	IRS1	SYK	JAK2		CVD	MAPK1, HSP90AA1
RAC1	RUVBL1	SYK	JAK2	AR		Diabets + Hypertension	GNAI2
JAK1	EFT1	PTK2	AR	RAC1		Diabets + CVD	RAC1
SHC1	JAK2	FOS	PTK2	MAPK1		Diabets + CVD + Cancer	IRS1
GNAI2	RUVBL2	PRKCD	PRKCD	HSP90AA1		Diabets + CKD + Cancer	PTK2, SYK
IGF1R	RAF1	MAPK3	JUN	MAPK3		CVD + Cancer	MAPK3
						CVD + CKD	AR
						CVD + Cancer + CDK	STAT3, STAT1, EGFR
						CKD + Cancer	FOS, PRKCD
						Diabets + Hypertension + CVD + CKD + Cancer	JAK2
